# Supplementary material
Source: HighWire-hosted journal article supplement (https://rapm.bmj.com/content/46/6/490)

Supplemental Content

Supplemental Content 1: Details of search strategy

| Search | Query                                                                                                           |
|--------|-----------------------------------------------------------------------------------------------------------------|
| #1     | bupivacaine OR (bupivacaine hydrochloride) OR (plain bupivacaine) OR (standard bupivcaine) OR (bupivacaine HCl) |
| #2     | (liposomal bupivacaine) OR (liposome bupivacaine) OR depof foam OR exparel OR (extended release bupivacaine)    |
| #3     | #1 AND #2                                                                                                       |

Supplemental Content 2: Details of Risk of Bias Evaluation

| author      | year | Risk of Bias Evaluation                                                              |                                                                                                  |                                  |                             |                                                                                |                                                                                                                                                                       |                                                                    |                                                                                                       |
|-------------|------|--------------------------------------------------------------------------------------|--------------------------------------------------------------------------------------------------|----------------------------------|-----------------------------|--------------------------------------------------------------------------------|-----------------------------------------------------------------------------------------------------------------------------------------------------------------------|--------------------------------------------------------------------|-------------------------------------------------------------------------------------------------------|
|             |      | sequence generation                                                                  | allocation concealment                                                                           | blinded performance              | patient blinding            | blinded assessment                                                             | incomplete outcome                                                                                                                                                    | selective reporting                                                | other bias                                                                                            |
| Alijanipour | 2017 | determination of the allocation order by an Excel random number generator (low risk) | sequentially numered sealed envelopes that were opened just prior to the intervention (low risk) | surgeon not blinded (high risk)  | patients blinded (low risk) | blinded: patients, outcome assessors, data collectors, statistician (low risk) | 42 drop-outs (did not complete postoperative questionnaires) + 2 drop-outs retrospectively (did not meet inclusion criteria, error), drop-out rate of 26% (high risk) | all endpoints from the registered protocol are reported (low risk) | did not receive any financial founding (low risk)                                                     |
| Alter       | 2017 | randomization by birth date (high risk)                                              | not stated (sequence generation makes an allocation concealment difficult) (high risk)           | surgeons not blinded (high risk) | patients blinded (low risk) | observer assessment not stated (unclear risk)                                  | no drop-outs (low risk)                                                                                                                                               | no protocol registered, all endpoints reported (unclear risk)      | study was supported through an unrestricted educational grant from Pacira Pharmaceuticals (high risk) |

|                 |             |                                                                                                                                                          |                                                                                                                                                                                      |                                                                                                                                                                                 |                             |                                                        |                                                            |                                                                       |                                                                                                   |
|-----------------|-------------|----------------------------------------------------------------------------------------------------------------------------------------------------------|--------------------------------------------------------------------------------------------------------------------------------------------------------------------------------------|---------------------------------------------------------------------------------------------------------------------------------------------------------------------------------|-----------------------------|--------------------------------------------------------|------------------------------------------------------------|-----------------------------------------------------------------------|---------------------------------------------------------------------------------------------------|
| <b>Barron</b>   | <b>2017</b> | randomization table created by an integer generator, random allocation sequence for 64 patients in blocks of 8 with an equal allocation ratio (low risk) | Randomization sequence housed by the Florida Hospital Investigational Pharmacy (third party) (low risk)                                                                              | surgeon not blinded (high risk)                                                                                                                                                 | patients blinded (low risk) | fully blinded (low risk)                               | 8 drop-outs, explained, equally distributed (unclear risk) | all endpoints from the registered protocol are reported (low risk)    | low risk                                                                                          |
| <b>Bramlett</b> | <b>2012</b> | randomization in different equal and unequal ratios via a centralized randomization system (low risk)                                                    | central randomization by a third party (low risk)                                                                                                                                    | preparation and administration of study drug not blinded (high risk)                                                                                                            | patients blinded (low risk) | fully blinded (low risk)                               | 18 drop-out, insufficient explanation (high risk)          | all endpoints from the registered protocol are reported (low risk)    | support by Pacira Pharmaceuticals, one author is paid employee by Pacira (high risk)              |
| <b>Bultema</b>  | <b>2016</b> | random assignment of a 6 digit number from a master list (low risk)                                                                                      | The master list of 6-digit random numbers was not made available to the primary investigator until completion of the study (low risk)                                                | syringes wrapped with opaque tape with the corresponding 6 digit number provided by not involved personnel (low risk)                                                           | patients blinded (low risk) | double-blind: patient, primary investigator (low risk) | 5 drop-outs, 5 emergency treatments, explained (low risk)  | no protocol registered, all endpoints reported (unclear risk)         | low risk                                                                                          |
| <b>Dale</b>     | <b>2019</b> | Block Randomization in groups of 10 (low risk)                                                                                                           | not stated (unclear risk)                                                                                                                                                            | single -blinded: (high risk); surgeon who administered the injection was not blinded                                                                                            | patients blinded (low risk) | observer blinded, data collection blinded (low risk)   | 2 drop-outs, explained (low risk)                          | More outcomes than in the registered protocol are reported (low risk) | The Exparel used in the study was donated by Pacira Pharmaceuticals (high risk)                   |
| <b>Glenn</b>    | <b>2016</b> | random assignment of a 6 digit number from a master list (low risk)                                                                                      | copy of the master list of the 6 digit numbers was supplied by the lead researcher and was not made known to the investigator during data collection period (third party) (low risk) | anesthetic formulation was drawn into plastic syringes wrapped with opaque tape with the corresponding 6-digit number by trained personnel not involved in the study (low risk) | patients blinded (low risk) | blinded: patient, doctor, investigator (low risk)      | 13 drop-outs, explained (unclear risk)                     | no protocol registered, all endpoints reported (unclear risk)         | supported by a research grant from the American Association of Endodontists Foundation (low risk) |

|          |      |                                                                                      |                                                                                                  |                                                                                                                                                                                                                     |                                         |                                                                                                                                                                                             |                                                         |                                                                                    |                                                                                                              |
|----------|------|--------------------------------------------------------------------------------------|--------------------------------------------------------------------------------------------------|---------------------------------------------------------------------------------------------------------------------------------------------------------------------------------------------------------------------|-----------------------------------------|---------------------------------------------------------------------------------------------------------------------------------------------------------------------------------------------|---------------------------------------------------------|------------------------------------------------------------------------------------|--------------------------------------------------------------------------------------------------------------|
| Ha       | 2019 | Randomized block design with five patient blocks (low risk)                          | study arm allocation only known to the study coordinator until the day of surgery (unclear risk) | surgeons not blinded (high risk)                                                                                                                                                                                    | patients blinded (low risk)             | The senior author (T.M.M.) was the only individual aware of which drug was injected because of its different color, but performed none of the pain evaluations or data collation (low risk) | 26 drop-outs, explained (drop-out rate 37%) (high risk) | all endpoints from the registered protocol are reported, but the costs. (low risk) | grant from hospital foundation, no industrial sponsorship, one author received unrelated founding (low risk) |
| Haas     | 2012 | patients were randomized in an 1:1:1 ratio (low risk)                                | not stated (unclear risk)                                                                        | Because LB and bupivacaine HCl are visually distinguishable, study medications were dispensed via sheathed syringes by study personnel not involved with any protocol-specific postsurgical assessments. (low-risk) | patients blinded (low risk)             | staff involved with study-related evaluations remained blinded, low risk                                                                                                                    | 3 drop-outs, explained (low risk)                       | no protocol registered, all endpoints reported (unclear risk)                      | supported by Pacira Pharmaceuticals (high risk)                                                              |
| Hutchins | 2015 | randomization with an equal allocation ratio by a random number generator (low risk) | not stated (unclear risk)                                                                        | practitioner not blinded (high risk)                                                                                                                                                                                | patients blinded most likely (low risk) | blinded: all sugical, nursing and research personell (low risk)                                                                                                                             | 3 drop-outs, explained (low risk)                       | all endpoints from the registered protocol are reported (low risk)                 | grant funding from Pacira Pharmaceuticals (high risk)                                                        |
| Hutchins | 2016 | randomization by random numbers (low risk)                                           | closed envelope (low risk)                                                                       | practitioner not blinded (high risk)                                                                                                                                                                                | patients blinded (low risk)             | blinded: research personell, patient, not blinded: personell performing the block (low risk)                                                                                                | 1 drop-out, explained (low risk)                        | all endpoints from the registered protocol are reported (low risk)                 | consultant for Pacira Pharmaceuticals (high risk)                                                            |
| Iwanoff  | 2018 | computer generated randomization using REDCap (low risk)                             | not stated (unclear risk)                                                                        | single-blinded (high risk)                                                                                                                                                                                          | patients blinded (low risk)             | observer not blinded (high-risk)                                                                                                                                                            | 6 drop-outs, explained (unclear risk)                   | all endpoints from the registered protocol are reported (low risk)                 | low risk                                                                                                     |
| Knight   | 2015 | Computer-generated block randomization (low risk)                                    | not stated (unclear risk)                                                                        | surgeon not blinded (high risk)                                                                                                                                                                                     | patients blinded (low risk)             | observer not blinded (high risk)                                                                                                                                                            | all drop outs explained (low risk)                      | no study protocol released, no selective reporting within the paper (unclear risk) | low risk                                                                                                     |

|                  |             |                                                                                  |                                                                                       |                                                                                                                     |                             |                                                                                 |                                                                                       |                                                                                    |                                                                                  |
|------------------|-------------|----------------------------------------------------------------------------------|---------------------------------------------------------------------------------------|---------------------------------------------------------------------------------------------------------------------|-----------------------------|---------------------------------------------------------------------------------|---------------------------------------------------------------------------------------|------------------------------------------------------------------------------------|----------------------------------------------------------------------------------|
| <b>Knudson</b>   | <b>2016</b> | randomization (unclear risk)                                                     | sealed opaque envelope (low risk)                                                     | not blinded surgery resident held the information about the anesthetic used and performed the injection (high risk) | patients blinded (low risk) | double blinded, blind: colorectal surgeon, patient (low risk)                   | 6 drop-outs, explained and sensitivity analysis did not change the outcome (low risk) | selective reporting of endpoints (Toradol and Orfimev use?) (unclear risk)         | low risk                                                                         |
| <b>Motakef</b>   | <b>2017</b> | randomization by using a computer randomizer (low risk)                          | not stated (unclear risk)                                                             | single- blind (high risk)                                                                                           | patients blinded (low risk) | observer not blinded (high risk)                                                | not drop-outs (low risk)                                                              | all endpoints from the registered protocol are reported (low risk)                 | funding from Plastic Surgery foundation (low risk)                               |
| <b>Nadeau</b>    | <b>2016</b> | Computer generated randomized list, study number (low risk)                      | sealed envelopes (low risk)                                                           | double-blinded: patient, surgeon (low risk)                                                                         | patients blinded (low risk) | observer blinded (low risk)                                                     | 3 drop-outs, explained (low risk)                                                     | no study protocol released, study not registered (unclear risk)                    | funded by a resident research grant from Riverside Methodist Hospital (low risk) |
| <b>Perets</b>    | <b>2017</b> | document with numbers provided and generated by the hospital pharmacy (low risk) | randomized, sealed and numbered envelopes (low risk)                                  | surgeon not blinded (high risk)                                                                                     | patients blinded (low risk) | observer blinded (low risk)                                                     | no drop-outs (low risk)                                                               | all endpoints from the registered protocol are reported (low risk)                 | research support from Pacira Inc (high risk)                                     |
| <b>Premkumar</b> | <b>2016</b> | computer generated random numbers with blocks of 4 (low risk)                    | sealed envelopes opened in the operating room by the operating staff (low risk)       | double-blind: patient and surgeon (low risk)                                                                        | patients blinded (low risk) | every member of the clinical team involved in the postoperative care (low risk) | 3 drop-outs, explained (low risk)                                                     | all endpoints from the registered protocol are reported (low risk)                 | low risk                                                                         |
| <b>Schroer</b>   | <b>2015</b> | randomization by the circulating nurse (unclear risk)                            | medication used was recorded in the patients' electronical medical record (high risk) | not blinded: surgeon, surgical team (high risk)                                                                     | patients blinded (low risk) | research collection was blinded (low risk)                                      | no drop-outs (low risk)                                                               | no study protocol released, study not registered (unclear risk)                    | low risk                                                                         |
| <b>Schumer</b>   | <b>2018</b> | Randomization via a computer-generated sequence (low risk)                       | envelopes (low risk)                                                                  | single-blind (high risk), patients blinded                                                                          | patients blinded (low risk) | observer not blinded (high risk)                                                | 3 drop-outs, explained (low risk)                                                     | no selective reporting within the paper, no study protocol released (unclear risk) | low risk                                                                         |



|            |      |                                                                                                                                                                                                           |                                                                                              |                                                                                             |                             |                                                                                                                                                                                           |                                   |                                                                                    |                                              |
|------------|------|-----------------------------------------------------------------------------------------------------------------------------------------------------------------------------------------------------------|----------------------------------------------------------------------------------------------|---------------------------------------------------------------------------------------------|-----------------------------|-------------------------------------------------------------------------------------------------------------------------------------------------------------------------------------------|-----------------------------------|------------------------------------------------------------------------------------|----------------------------------------------|
| Vandepitte | 2017 | Randomization via a computer-generated sequence (low risk)                                                                                                                                                | opaque sealed envelopes opened by the primary investigator just before performing (low risk) | double-blinded: staff, surgeons, patients (low risk)                                        | patients blinded (low risk) | blinded staff conducted all patient follow-up assessments (low risk)                                                                                                                      | 2 drop-outs, explained (low risk) | all endpoints from the registered protocol are reported (low risk)                 | funded by Pacira Pharmaceuticals (high risk) |
| Wong       | 2020 | Patients were randomized in a 1:1:1 ratio to either receive an intraoperative, laparoscopic-guided TAP block with LB, an TAP block with RB, or NB by a computer program before each operation. (low risk) | not stated (unclear risk)                                                                    | surgeon not blinded (high risk)                                                             | patients blinded (low risk) | In addition, the nursing staff was blinded, which allowed them to record the pain scores as per nursing protocol without bias. The research staff collecting data was blinded. (low risk) | no drop-outs (low risk)           | all endpoints from the registered protocol are reported (low risk)                 | low risk                                     |
| Zlotnicki  | 2018 | Randomization (unclear risk)                                                                                                                                                                              | not stated (unclear risk)                                                                    | blinded: patient, staff (nursing and physical therapy), performance not blinded (high risk) | patients blinded (low risk) | observer blinded (low risk)                                                                                                                                                               | 2 drop-outs, explained (low risk) | no study protocol released, no selective reporting within the paper (unclear risk) | low risk                                     |

Supplemental Content 3: Demographic characteristics of included studies

| author, year      | number |    | age (years) |             | Weight (kg)  |              | BMI (kg/m²) |            | sex (n) |       | ASA Status |           | length of surgery (min) |               |
|-------------------|--------|----|-------------|-------------|--------------|--------------|-------------|------------|---------|-------|------------|-----------|-------------------------|---------------|
|                   | LB     | PB | LB          | PB          | LB           | PB           | LB          | PB         | LB      | PB    | LB         | PB        | LB                      | PB            |
|                   |        |    | Mean (SD)   | Mean (SD)   | Mean (SD)    | Mean (SD)    | Mean (SD)   | Mean (SD)  | m/f     | m/f   | I-IV       | I-IV      | Mean (SD)               | Mean (SD)     |
| Alijanipour, 2017 | 59     | 59 | 65.5 (8.7)  | 65.4 (7.3)  | ns           | ns           | 31.4 (5.5)  | 30 (6.32)  | 29/30   | 27/32 | ns         | ns        | 85.9 (17.8)             | 85.6 (16.7)   |
| Alter, 2017       | 20     | 21 | 63 (15)     | 57 (15)     | ns           | ns           | ns          | ns         | 4/16    | 4/17  | ns         | ns        | ns                      | ns            |
| Barron, 2017      | 32     | 32 | 45 (8.6)    | 45.4 (9.1)  | ns           | ns           | 29 (16)     | 27.6 (6.1) | 0/32    | 0/32  | ns         | ns        | 93 (56)                 | 105 (51)      |
| Bramlett, 2012    | 52     | 35 | 61.3 (7.85) | 62.2 (7.2)  | 94.5 (17.88) | 90.9 (16.41) | ns          | ns         | 26/27   | 11/23 | I-III      | I-III     | ns                      | ns            |
| Bultema, 2016     | 47     | 48 | 33 (11)     | 34 (10)     | ns           | ns           | ns          | ns         | 22/25   | 18/30 | I-II       | I-II      | ns                      | ns            |
| Dale, 2019        | 26     | 26 | ns          | ns          | ns           | ns           | ns          | ns         | 15/11   | 14/12 | 1/15/10    | 1/15/10   | ns                      | ns            |
| Glenn, 2016       | 52     | 48 | 36 (10)     | 37 (13)     | ns           | ns           | ns          | ns         | 16/36   | 21/27 | I-II       | I-II      | ns                      | ns            |
| Ha, 2019          | 22     | 22 | 49 (9.2)    | 49 (10)     | 80.7 (13.6)  | 76.5 (12.3)  | 29.1 (4.6)  | 28.1 (4.5) | ns      | ns    | II         | I-III     | ns                      | ns            |
| Haas, 2012        | 74     | 26 | 43 (11)     | 44 (11)     | 81 (20)      | 80 (16)      | ns          | ns         | 55/19   | 15/11 | ns         | ns        | ns                      | ns            |
| Hutchins, 2015    | 28     | 30 | 60.5 (10.8) | 56.8 (10.0) | 89.3 (25.1)  | 98.5 (34.2)  | ns          | ns         | 0/28    | 0/30  | 4/15/9     | 4/13/13   | 256.5 (49.5)            | 245.5 (71.25) |
| Hutchins, 2016    | 30     | 29 | 41.0 (12.5) | 38.0 (12.6) | 78.7 (12.3)  | 75.5 (15.5)  | ns          | ns         | 14/16   | 10/20 | ns         | ns        | 404 (184)               | 352 (144)     |
| Iwanoff, 2018     | 24     | 33 | 53.3 (10.8) | 51.2 (7.6)  | ns           | ns           | 27.8 (5.3)  | 25.9 (4.1) | 0/24    | 0/33  | ns         | ns        | 30.25 (9.25)            | 30.5 (9)      |
| Knight, 2015      | 97     | 94 | 62 (2.7)    | 63 (2.7)    | ns           | ns           | 28.2 (1.2)  | 28.9 (1.5) | 63/34   | 57/37 | ns         | ns        | ns                      | ns            |
| Knudson, 2016     | 27     | 30 | 66.2 (15.7) | 67.9 (11.2) | ns           | ns           | 26.9 (5.8)  | 30.8 (6.2) | 15/12   | 15/15 | 0/12/14/1  | 0/9/20/1  | ns                      | ns            |
| Motakef, 2017     | 12     | 12 | 48.7 (12.5) | 56.2 (12.6) | ns           | ns           | 25.9 (3.2)  | 25.3 (4.5) | 0/12    | 0/12  | ns         | ns        | ns                      | ns            |
| Nadeau 2016       | 34     | 34 | 33 (11.3)   | 33 (11.3)   | ns           | ns           | 21.9 (4)    | 21.9 (4)   | 0/34    | 0/34  | ns         | ns        | ns                      | ns            |
| Perets, 2017      | 50     | 57 | 61.9 (9.55) | 62.4 (12.1) | ns           | ns           | 29.2 (6.85) | 31.0 (9.0) | 21/29   | 26/31 | 8/26/16/0  | 4/31/21/1 | ns                      | ns            |
| Premkumar, 2016   | 14     | 15 | 24.1 (7.3)  | 25.5 (6.8)  | ns           | ns           | 24.3 (2.5)  | 26.2 (7.6) | 9/5     | 7/8   | ns         | ns        | 87.7 (14.3)             | 80.2 (14.7)   |
| Schroer, 2015     | 58     | 53 | 67 (8.8)    | 68.6 (9.2)  | ns           | ns           | 32 (5.9)    | 32 (5.7)   | 24/34   | 21/32 | 1/36/21/0  | 5/34/14/0 | ns                      | ns            |
| Schumer, 2018     | 67     | 64 | 68.4        | 68.4        | ns           | ns           | 31.3        | 31.3       | ns      | ns    | ns         | ns        | ns                      | ns            |
| Vandepitte, 2017  | 26     | 24 | 61 (11)     | 57 (12)     | ns           | ns           | 28 (4)      | 27 (5)     | 13/13   | 10/14 | 6/19/1/0   | 7/17/0/0  | ns                      | ns            |
| Wong, 2020        | 75     | 71 | 42.1 (9.8)  | 39.4 (10.9) | 119.5 (23.8) | 121.7 (22.6) | 44.5 (7.6)  | 44.8 (5.5) | 15/60   | 16/55 | ns         | ns        | ns                      | ns            |
| Zlotnicki, 2018   | 38     | 40 | 63.2 (7.2)  | 64.3 (8.8)  | ns           | ns           | 35.5 (7.4)  | 35.4 (6.6) | 19/19   | 14/26 | ns         | ns        | ns                      | ns            |

Abbreviations: LB: liposomal bupivacaine; PB: plain bupivacaine; SD: standard deviation, ASA: American Society of Anesthesiologist

Supplemental Content 3: Levels of Evidence Table: Liposomal bupivacaine vs plain bupivacaine

| Outcomes                        | Limitations                                           | Inconsistency/<br>Heterogeneity                                            | Indirectness                                | Imprecision            | Publication bias | Mean difference (MD) or<br>Ratio of Means (ROM)<br>[95% Confidence Interval] | Number of participants (studies) | Quality or certainty of the evidence (GRADE) |
|---------------------------------|-------------------------------------------------------|----------------------------------------------------------------------------|---------------------------------------------|------------------------|------------------|------------------------------------------------------------------------------|----------------------------------|----------------------------------------------|
| Pain Scores 24h [NRS 0-10] (MD) | Potential overestimation due to unblinded performance | <i>Low</i> , $I^2$ of 0%<br>p-value for heterogeneity: $p = 0.84$          | None (pairwise meta-analysis, fully direct) | No serious imprecision | Not detected     | MD<br>-0.37 (95%-CI -0.56; -0.19)                                            | 1348 (17 studies)                | ⊕⊕⊕⊕<br>HIGH (homogenous results)            |
| MEQ 24h [mg] (ROM)              | Potential serious limitation due to risk of bias      | <i>moderate</i> , $I^2$ of 44%<br>p-value for heterogeneity: $p = 0.04$    | None                                        | No serious imprecision | Not detected     | ROM<br>0.85 (95%-CI 0.82; 0.89)                                              | 1086 (14 studies)                | ⊕⊕⊕⊕<br>HIGH (homogenous results)            |
| Pain Scores 72h [NRS 0-10] (MD) | Potential serious limitation due to risk of bias      | <i>substantial</i> , $I^2$ of 74%<br>p-value for heterogeneity: $p < 0.01$ | None                                        | No serious imprecision | Not detected     | MD<br>-0.25 (95%-CI -0.71; 0.20)                                             | 1203 (15 studies)                | ⊕⊕⊕<br>MODERATE (substantial heterogeneity)  |
| MEQ 72h [mg] (ROM)              | Potential serious limitation due to risk of bias      | <i>Low</i> , $I^2$ of 32%<br>p-value for heterogeneity: $p = 0.16$         | None                                        | No serious imprecision | Not detected     | ROM<br>0.85 (95%-CI 0.77; 0.95)                                              | 680 (9 studies)                  | ⊕⊕⊕⊕<br>HIGH (homogenous results)            |

|                                 |                                                  |    |      |    |    |    |    |    |
|---------------------------------|--------------------------------------------------|----|------|----|----|----|----|----|
| Time to first analgesic request | Potential serious limitation due to risk of bias | NA | None | NA | NA | NA | NA | NA |
| Adverse events                  | Potential serious limitation due to risk of bias | NA | None | NA | NA | NA | NA | NA |
|                                 |                                                  |    |      |    |    |    |    |    |

Supplemental Content 4:

| Study       | year | Drug approved by the FDA for this indication | Off-label use | Study performed with an Investigational New Drug (IND)                                                                           |
|-------------|------|----------------------------------------------|---------------|----------------------------------------------------------------------------------------------------------------------------------|
| Alijanipour | 2017 | x                                            |               |                                                                                                                                  |
| Alter       | 2017 | x                                            |               |                                                                                                                                  |
| Barron      | 2017 | x                                            |               |                                                                                                                                  |
| Bramlett    | 2012 | x                                            |               |                                                                                                                                  |
| Bultema     | 2016 | x                                            |               |                                                                                                                                  |
| Dale        | 2019 | x                                            |               |                                                                                                                                  |
| Glenn       | 2016 | x                                            |               |                                                                                                                                  |
| Ha          | 2019 | x                                            |               |                                                                                                                                  |
| Haas        | 2012 | x                                            |               |                                                                                                                                  |
| Hutchins    | 2015 | x                                            |               |                                                                                                                                  |
| Hutchins    | 2016 | x                                            |               |                                                                                                                                  |
| Iwanoff     | 2018 | x                                            |               |                                                                                                                                  |
| Knight      | 2015 | x                                            |               |                                                                                                                                  |
| Knudson     | 2016 | x                                            |               |                                                                                                                                  |
| Motakef     | 2017 | x                                            |               |                                                                                                                                  |
| Nadeau      | 2016 | x                                            |               |                                                                                                                                  |
| Perets      | 2017 | x                                            |               |                                                                                                                                  |
| Premkumar   | 2016 | x                                            |               |                                                                                                                                  |
| Schroer     | 2015 | x                                            |               |                                                                                                                                  |
| Schumer     | 2018 | x                                            |               |                                                                                                                                  |
| Vandepitte  | 2017 |                                              |               | x, Liposomal bupivacaine was used as investigational drug in this study before its approval for interscalene nerve block in 2018 |
| Wong        | 2020 | x                                            |               |                                                                                                                                  |
| Zlotnicki   | 2018 | x                                            |               |                                                                                                                                  |

Supplemental Content 5: Adverse event

| author, year      | nausea/vomiting |    |    |    | dizziness |    |    |    | Pruritus |    |    |    | urinating difficulties |    |    |    | thrombembolic complications |    |    |    | neurologic complications |    |    |    | local anesthetic systemic toxicity |    |    |   | wound healing complications |    |    |    | hypesthesia/ numbness |   |   |    |    |    |    |
|-------------------|-----------------|----|----|----|-----------|----|----|----|----------|----|----|----|------------------------|----|----|----|-----------------------------|----|----|----|--------------------------|----|----|----|------------------------------------|----|----|---|-----------------------------|----|----|----|-----------------------|---|---|----|----|----|----|
|                   | LB              |    | PB |    | LB        |    | PB |    | LB       |    | PB |    | LB                     |    | PB |    | LB                          |    | PB |    | LB                       |    | PB |    | LB                                 |    | PB |   | LB                          |    | PB |    |                       |   |   |    |    |    |    |
|                   | e               | n  | e  | n  | e         | n  | e  | n  | e        | n  | e  | n  | e                      | n  | e  | n  | e                           | n  | e  | n  | e                        | n  | e  | n  | e                                  | n  | e  | n | e                           | n  | e  | n  | e                     | n | e | n  |    |    |    |
| Alijanipour, 2017 |                 |    |    |    |           |    |    |    |          |    |    |    |                        |    |    |    | 1                           | 87 | 1  | 75 | 2                        | 87 | 0  | 75 |                                    |    |    |   | 1                           | 87 | 0  | 75 |                       |   |   |    |    |    |    |
| Alter, 2017       |                 |    |    |    |           |    |    |    |          |    |    |    |                        |    |    |    |                             |    |    |    |                          |    |    |    |                                    |    |    |   |                             |    |    |    |                       |   |   | 16 | 20 | 11 | 21 |
| Barron, 2017      | 4               | 16 | 6  | 25 | 1         | 16 | 3  | 25 |          |    |    |    | 2                      | 16 | 5  | 25 | 2                           | 16 | 5  | 25 |                          |    |    |    |                                    |    |    |   |                             |    |    |    |                       |   |   |    |    |    |    |
| Bramlett, 2012    | 20              | 53 | 23 | 34 | 6         | 53 | 6  | 34 | 6        | 53 | 6  | 34 | 1                      | 53 | 0  | 34 |                             |    |    |    |                          |    |    |    |                                    |    |    |   |                             |    |    |    |                       |   | 2 | 53 | 0  | 34 |    |
| Bultema, 2016     |                 |    |    |    |           |    |    |    |          |    |    |    |                        |    |    |    |                             |    |    |    |                          |    |    |    |                                    |    |    |   |                             |    |    |    |                       |   |   |    |    |    |    |
| Dale, 2019        |                 |    |    |    |           |    |    |    |          |    |    |    |                        |    |    |    |                             |    |    |    |                          |    |    |    |                                    |    |    |   |                             |    |    |    |                       |   |   |    |    |    |    |
| Glenn, 2016       |                 |    |    |    |           |    |    |    |          |    |    |    |                        |    |    |    |                             |    |    |    |                          |    |    |    |                                    |    |    |   |                             |    |    |    |                       |   |   |    |    |    |    |
| Ha, 2019          |                 |    |    |    |           |    |    |    |          |    |    |    |                        |    |    |    |                             |    |    |    |                          |    |    |    |                                    |    |    |   |                             |    |    |    |                       |   |   |    |    |    |    |
| Haas, 2012        | 7               | 73 | 3  | 26 |           |    |    |    | 1        | 73 | 1  | 26 |                        |    |    |    |                             |    |    |    |                          |    |    |    |                                    |    |    |   |                             |    |    |    |                       |   |   |    |    |    |    |
| Hutchins, 2015    | 7               | 28 | 17 | 30 |           |    |    |    |          |    |    |    |                        |    |    |    |                             |    |    |    |                          |    |    |    |                                    |    |    |   |                             |    |    |    |                       |   |   |    |    |    |    |
| Hutchins, 2016    | 7               | 30 | 15 | 30 |           |    |    |    |          |    |    |    |                        |    |    |    |                             |    |    |    |                          |    |    |    |                                    |    |    |   |                             |    |    |    |                       |   |   |    |    |    |    |
| Iwanoff, 2018     |                 |    |    |    |           |    |    |    |          |    |    |    |                        |    |    |    | 0                           | 24 | 0  | 33 |                          |    |    |    |                                    |    |    |   |                             |    |    |    |                       |   |   |    |    |    |    |
| Knight, 2015      |                 |    |    |    |           |    |    |    |          |    |    |    |                        |    |    |    |                             |    |    |    |                          |    |    |    |                                    |    |    |   |                             |    |    |    |                       |   |   |    |    |    |    |
| Knudson, 2016     | 9               | 27 | 14 | 30 |           |    |    |    |          |    |    |    |                        |    |    |    |                             |    |    |    |                          |    |    |    |                                    |    |    |   |                             |    |    |    |                       |   |   |    |    |    |    |
| Motakef, 2017     | 3               | 12 | 2  | 12 |           |    |    |    |          |    |    |    |                        |    |    |    |                             |    |    |    |                          |    |    |    |                                    |    |    |   |                             |    |    |    |                       |   |   |    |    |    |    |
| Nadeau 2016       |                 |    |    |    |           |    |    |    |          |    |    |    |                        |    |    |    |                             |    |    |    |                          |    |    |    |                                    |    |    |   |                             |    |    |    |                       |   |   |    |    |    |    |
| Perets, 2017      | 12              | 43 | 8  | 48 |           |    |    |    |          |    |    |    |                        |    |    |    |                             |    |    |    |                          |    |    |    |                                    |    |    |   |                             |    |    |    |                       |   |   |    |    |    |    |
| Premkumar, 2016   |                 |    |    |    |           |    |    |    |          |    |    |    |                        |    |    |    |                             |    |    |    |                          |    |    |    |                                    |    |    |   |                             |    |    |    |                       |   |   |    |    |    |    |
| Schroer, 2015     | 3               | 58 | 2  | 53 |           |    |    |    |          |    |    |    |                        |    |    |    |                             |    |    |    |                          |    |    |    |                                    |    |    |   |                             |    |    |    |                       |   |   |    |    |    |    |
| Schumer, 2018     | 19              | 66 | 14 | 64 | 2         | 66 | 0  | 64 | 9        | 66 | 7  | 64 | 1                      | 66 | 2  | 64 | 1                           | 66 | 1  | 64 |                          |    |    |    |                                    |    |    |   |                             |    |    |    |                       |   |   |    |    |    |    |
| Vandepitte, 2017  |                 |    |    |    | 5         | 26 | 4  | 24 |          |    |    |    |                        |    |    |    | 1                           | 26 | 0  | 24 |                          |    |    |    | 4                                  | 25 | 3  | a | 24                          |    |    |    |                       |   |   |    |    |    |    |
| Wong, 2020        | 27              | 75 | 41 | 71 |           |    |    |    |          |    |    |    |                        |    |    |    |                             |    |    |    |                          |    |    |    |                                    |    |    |   |                             |    |    |    |                       |   |   |    |    |    |    |
| Zlotnicki, 2018   |                 |    |    |    |           |    |    |    |          |    |    |    |                        |    |    |    |                             |    |    |    |                          |    |    |    |                                    |    |    |   |                             |    |    |    |                       |   |   |    |    |    |    |

|                |      |     |      |     |     |     |     |     |     |     |      |     |   |     |     |     |     |     |     |     |     |    |   |    |    |    |      |    |     |    |   |    |      |    |    |    |
|----------------|------|-----|------|-----|-----|-----|-----|-----|-----|-----|------|-----|---|-----|-----|-----|-----|-----|-----|-----|-----|----|---|----|----|----|------|----|-----|----|---|----|------|----|----|----|
| total (n)      | 118  | 481 | 145  | 422 | 14  | 161 | 13  | 147 | 16  | 192 | 14   | 124 | 4 | 135 | 7   | 123 | 5   | 219 | 7   | 221 | 2   | 87 | 0 | 75 | 4  | 25 | 3    | 24 | 1   | 87 | 0 | 75 | 18   | 73 | 11 | 55 |
| percentage (%) | 24.5 |     | 34.4 |     | 8.7 |     | 8.8 |     | 8.3 |     | 11.3 |     | 3 |     | 5.7 |     | 2.3 |     | 3.2 |     | 2.3 |    | 0 |    | 16 |    | 12.5 |    | 1.5 |    | 0 |    | 24.7 |    | 20 |    |

Abbreviations: LB: liposomal bupivacaine; PB: plain bupivacaine; e: event; n: number  
a: ear ringing, metallic taste

Figure 1 is a two-sided graph showing the Cumulative Z-Score versus the Number of patients (Linear scaled). The Y-axis ranges from -8 to 8, and the X-axis ranges from 0 to 1025. The graph illustrates the monitoring boundary, the Z-curve, and the futility boundary. The Z-curve starts at approximately -7.5 at X=0 and rises to approximately 4.0 at X=1025. The monitoring boundary is a horizontal line at Y=8. The futility boundary is a horizontal line at Y=-2. The Z-curve crosses the futility boundary at approximately X=1025. The graph is titled "Mean Pain Score 24h is a Two-sided graph".

The y-axis depicts the required information size. The horizontal lines depict the conventional threshold for statistical (not clinical) significance at  $Z = 1.96/-1.96$  (i.e.  $p = 0.05$ ). The threshold for clinical relevance of the effect size is not shown in this figure. The outer and the inner curved diagonal lines, represent the adjusted threshold for statistical significance and the futility boundaries. The Z-curve refers to the statistical summary of the accrued data. If a Z-curve crosses the futility boundaries before the required information size is reached, the likelihood of finding a significant effect is negligible. If a Z-curve crosses the monitoring boundary (threshold of statistically significant treatment effect) before the information size is reached, further studies are unlikely to change the treatment effect.

Supplemental Content 7: Trial Sequential Analysis (TSA) for cumulative morphine equivalents (MEQ) after 24 hours

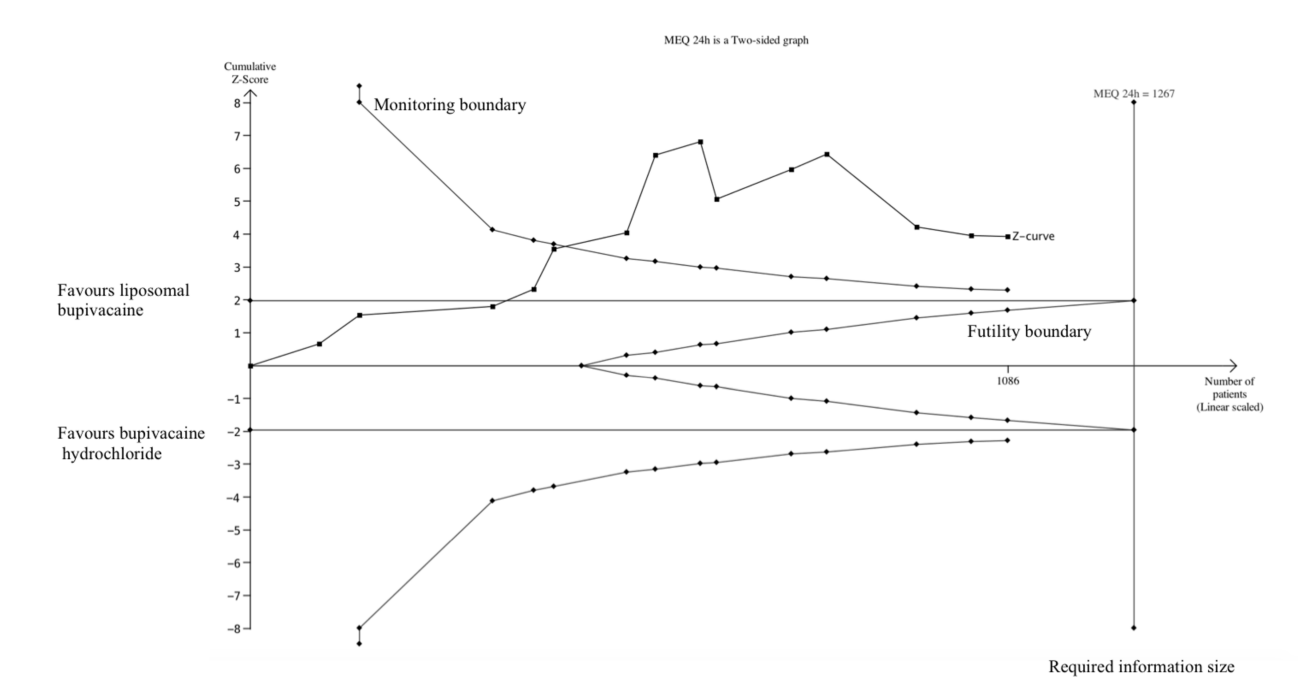

Supplemental Content 7: Trial sequential analysis for the cumulative morphine equivalents 24 hours postoperatively.

The y-axis depicts the required information size. The horizontal lines depict the conventional threshold for statistical (not clinical) significance at  $Z = 1.96 / -1.96$  (i.e.  $p = 0.05$ ). The threshold for clinical relevance of the effect size is not shown in this figure. The outer and the inner curved diagonal lines, represent the adjusted threshold for statistical significance and the futility boundaries. The Z-curve refers to the statistical summary of the accrued data. If a Z-curve crosses the futility boundaries before the required information size is reached, the likelihood of finding a significant effect is negligible. If a Z-curve crosses the monitoring boundary (threshold of statistically significant treatment effect) before the information size is reached, further studies are unlikely to change the treatment effect.



Supplemental Content 8: Not-predefined subgroup analysis for the influence of funding. (all forest plots include only non-industrial sponsored studies). Mean Pain Score 24 h and 72 h.

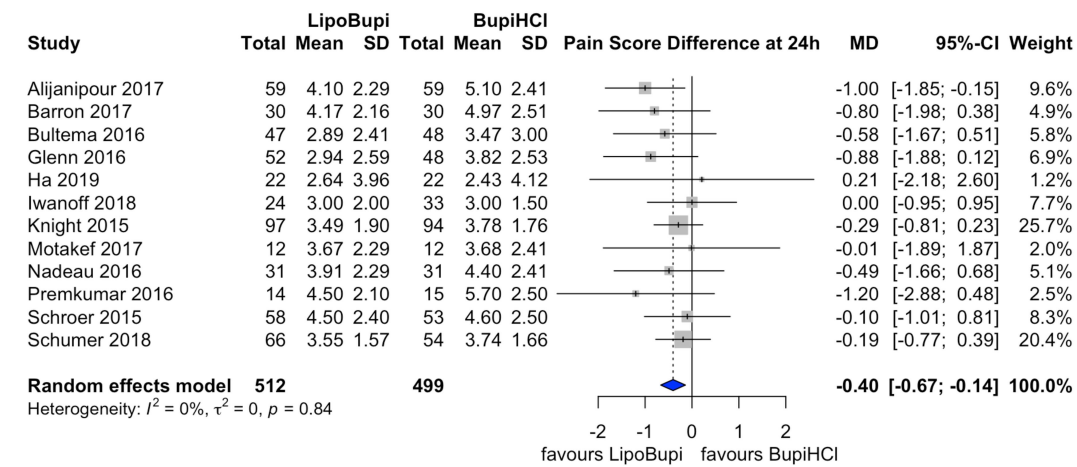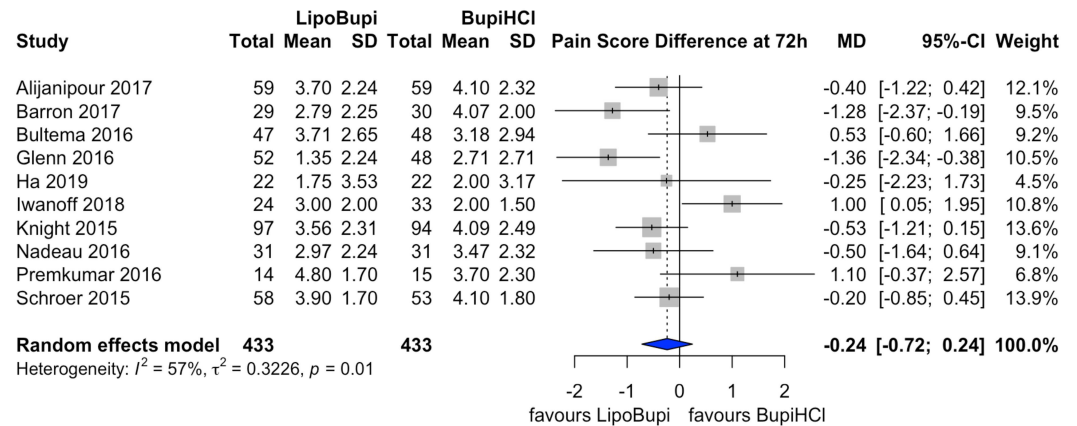

Supplemental Content 9: Not-predefined subgroup analysis for the influence of funding. (all forest plots include only non-industrial sponsored studies). Ratio of Morphine Equivalent Consumption 24 h and 72 h.

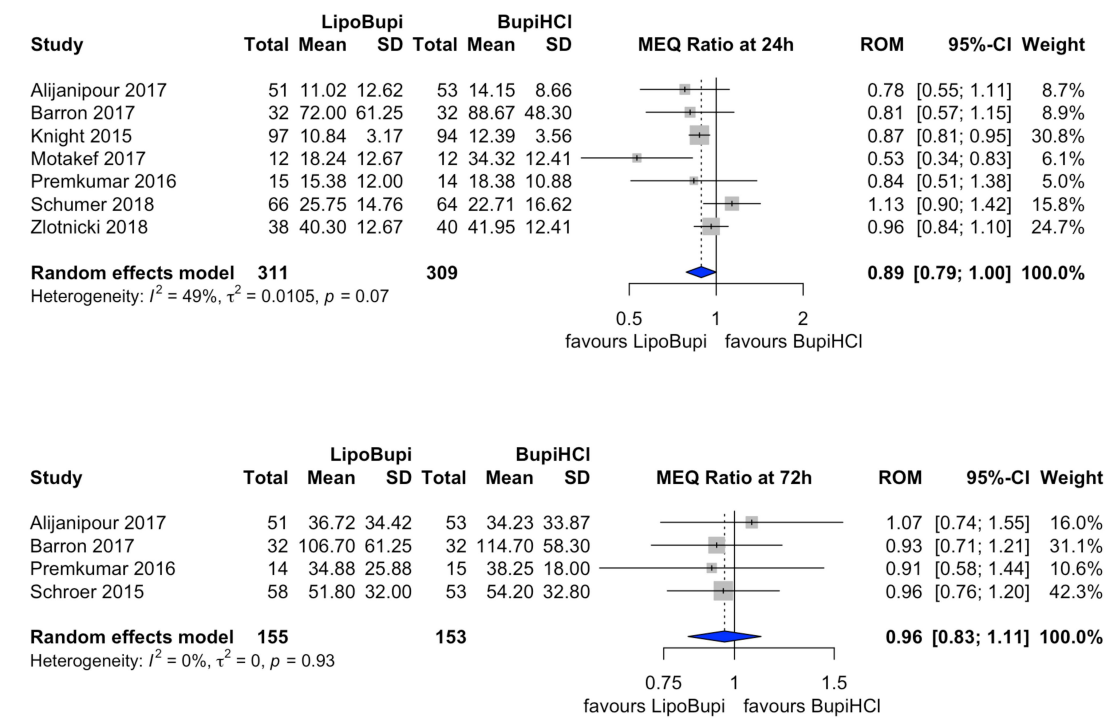

Supplemental Content 10: Funnel Plots to identify possible publication bias.

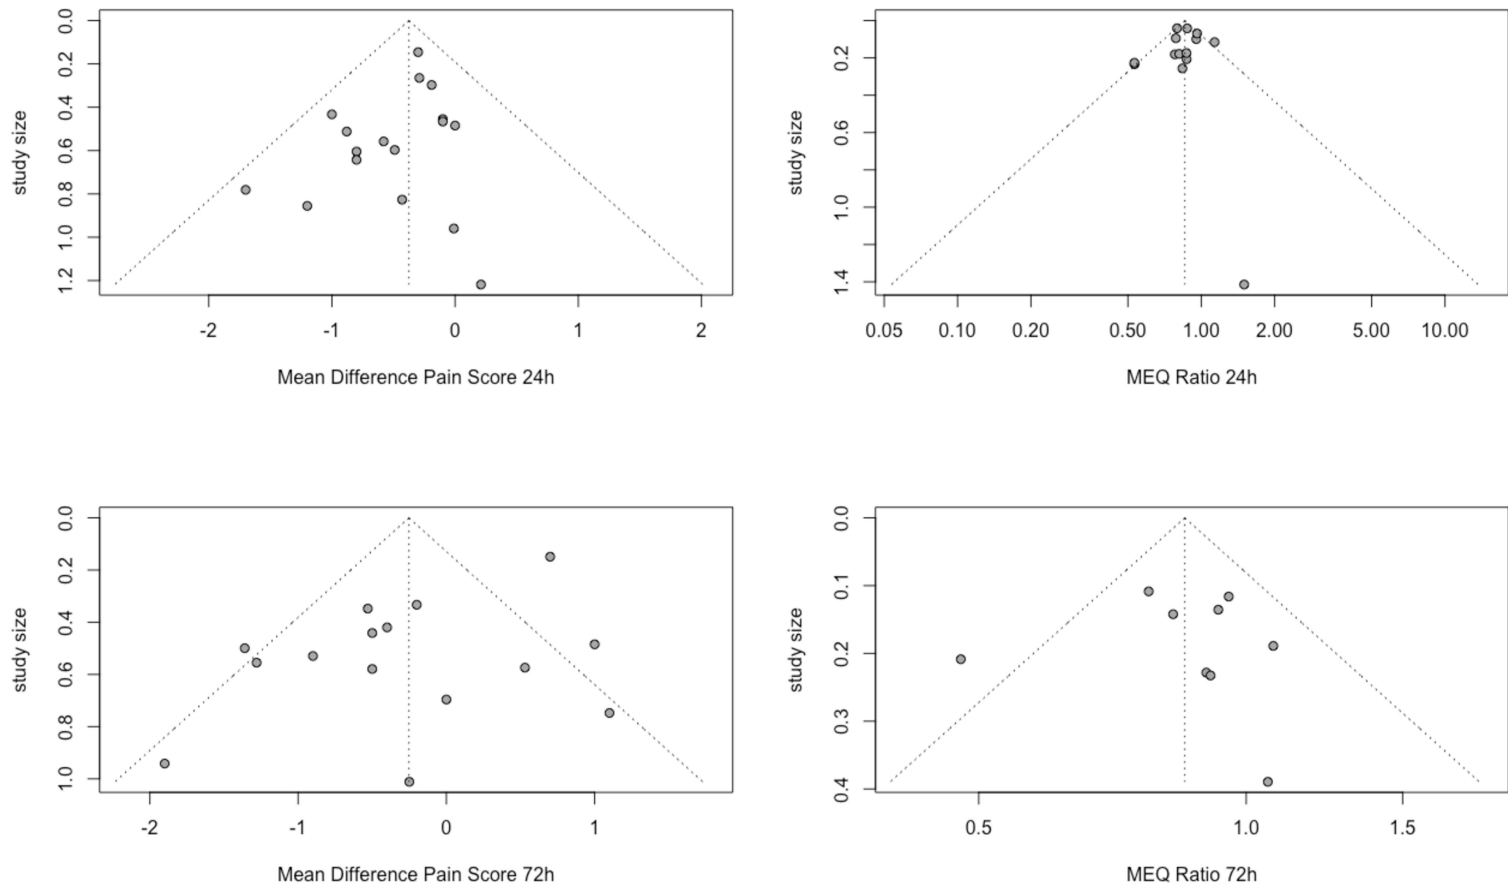

Supplemental Content 11: Not-predefined subgroup analysis for the influence of calculating mean (SD) from median (interquartile range or total range). (all forest plots include only studies that reported means in the original data). Mean Pain Score at 24 h and 72 h.

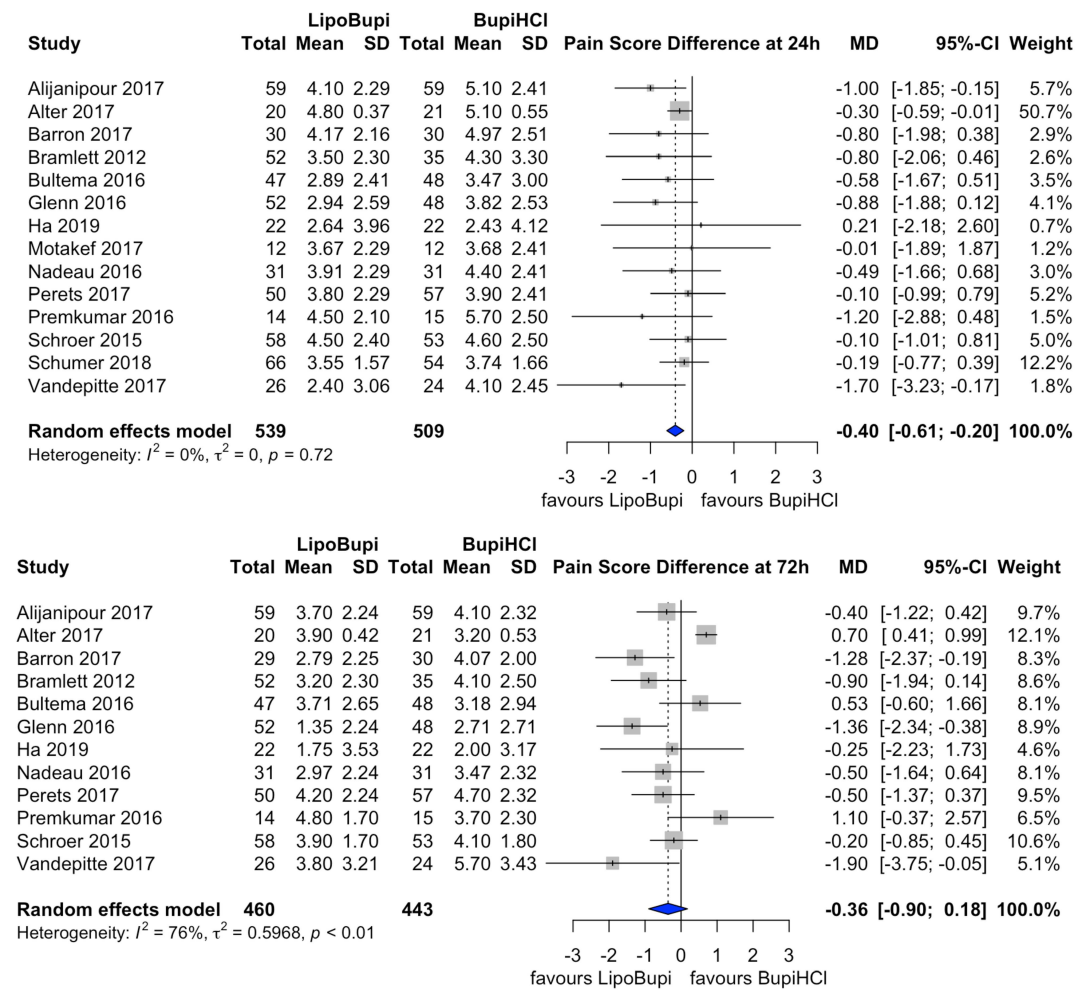

Supplemental Content 12: Not-predefined subgroup analysis for the influence of calculating mean (SD) from median (interquartile range or total range). (all forest plots include only studies that reported means in the original data). Ratio of Morphine Equivalents (MEQ) at 24 h and 72 h.

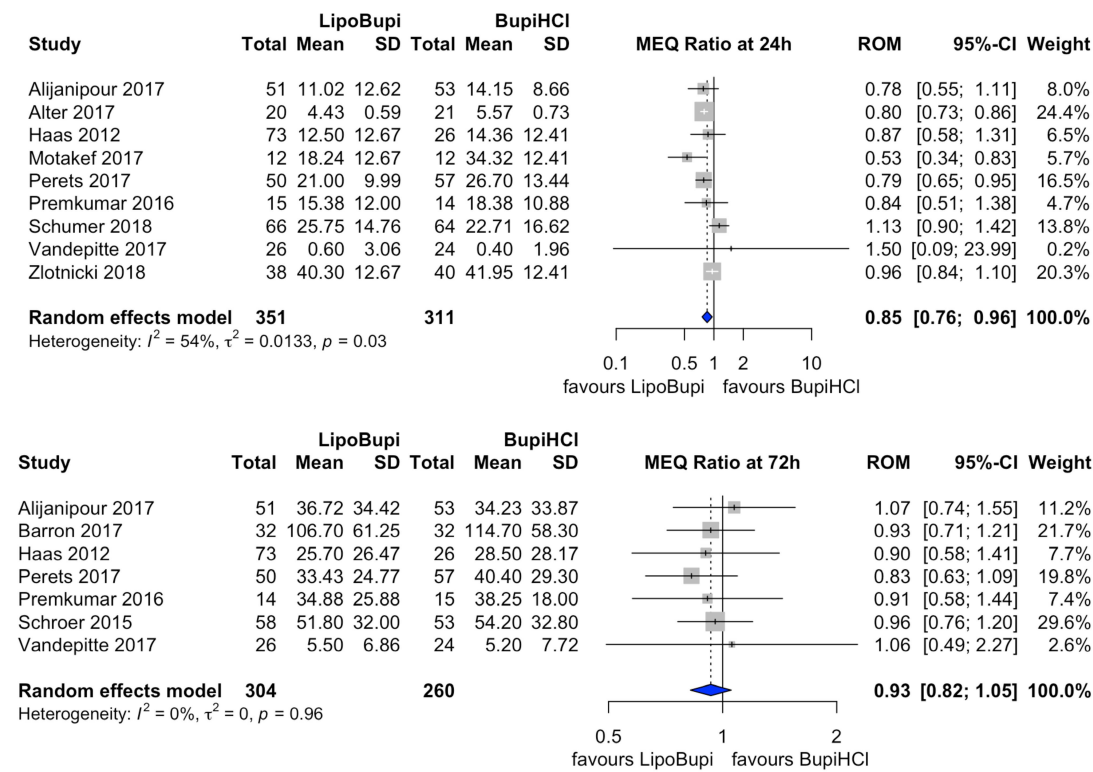

Supplement: inline-supplementary-material-1 [file inline-supplementary-material-1.pdf]
